# Supplementary material
Source: MDPI journal article supplement (https://www.mdpi.com/2073-4344/10/11/1274)
Supplement: s1 [file s1]

# Supplementary materials: Enhanced Electrocatalytic Activity of Stainless Steel Substrate by Nickel Sulfides for Efficient Hydrogen Evolution

Jong-Sang Youn <sup>1</sup>, Sangmin Jeong <sup>2</sup>, Inhwan Oh <sup>2</sup>, Sunyoung Park <sup>2</sup>, Hien Duy Mai <sup>2</sup> and Ki-Joon Jeon <sup>2,\*</sup>

<sup>1</sup> Department of Environmental Engineering, The Catholic University of Korea, Bucheon 14662, Korea; jsyoun@catholic.ac.kr

<sup>2</sup> Department of Environmental Engineering, Inha University, Incheon 22212, Korea; smjeong3268@gmail.com (S.J.); oh910611@naver.com (I.O.); 12171148@inha.edu (S.P.); hien.fasdas@gmail.com (H.D.M.)

\* Correspondence: kjeon@inha.ac.kr; Tel.: +82-32-860-7509

Received: 15 October 2020; Accepted: 2 November 2020; Published: date

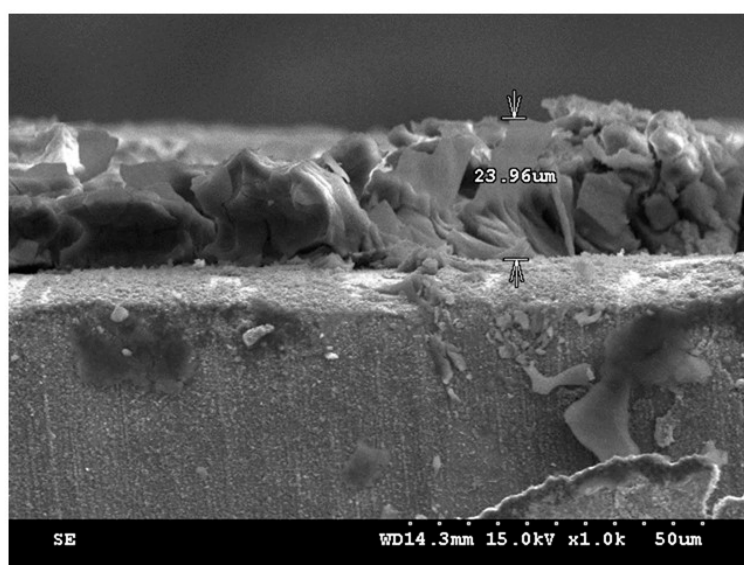

**Figure S1.** The thickness of the SEM image of NiS<sub>x</sub>/SUS.

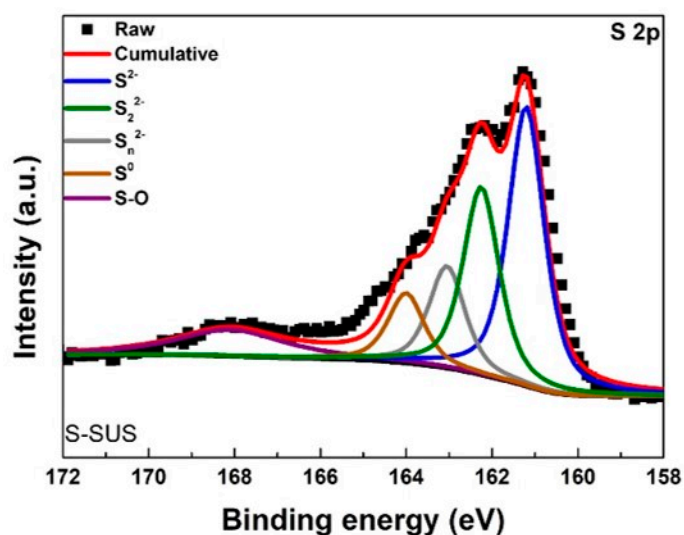

Figure S2. Deconvolution of the XPS peaks of S-SUS in the S 2p region.

Table S1. Surface chemical analysis of samples by XPS.

| Catalysts             | Ni 2p (atomic %) | S 2p (atomic %) | O 1s (atomic %) |
|-----------------------|------------------|-----------------|-----------------|
| SUS                   | 1.24             | 0               | 98.76           |
| S-SUS                 | 1.66             | 47.83           | 50.51           |
| NiS <sub>x</sub> /SUS | 6.65             | 15.99           | 77.36           |

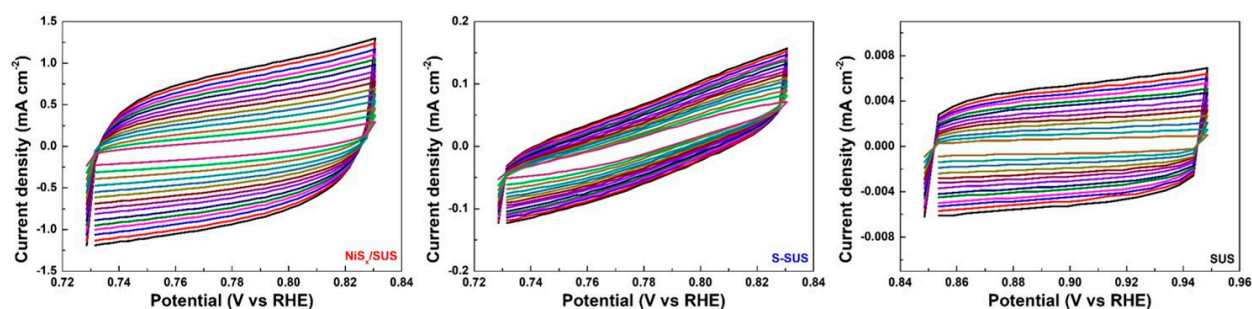

Figure S3. CV of the prepared electrodes in the non-faradaic regions at different scan rates ( $20 \text{ mV s}^{-1}$  to  $260 \text{ mV s}^{-1}$ ).

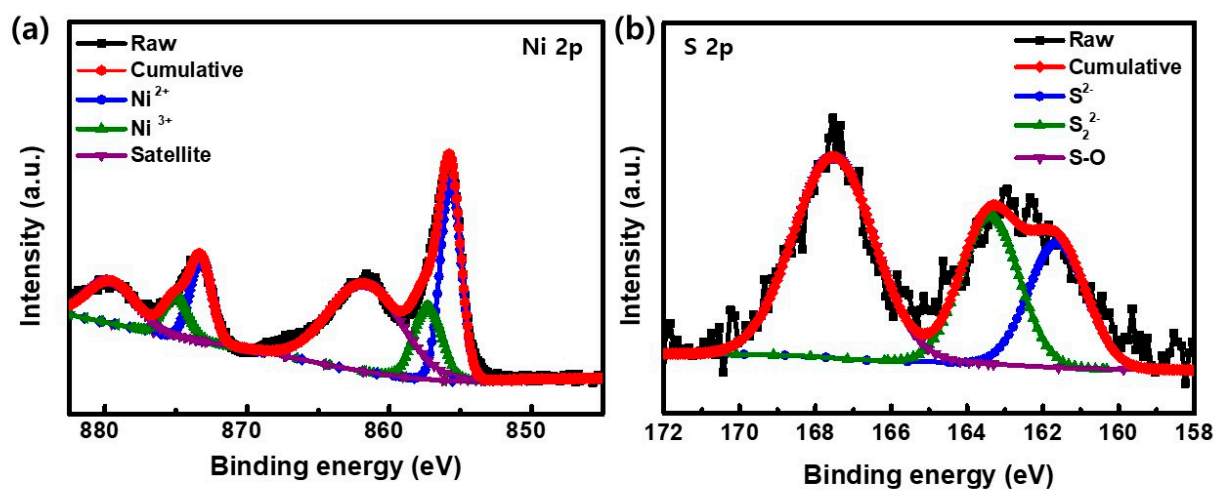

**Figure S4.** X-ray photoelectron spectroscopy (XPS) of NiS<sub>x</sub>/SUS after 2000 cycles in 1M KOH. (a) Ni 2p and (b) S 2p.
